# Supplementary material
Source: ML conference proceedings conference paper supplement (https://openreview.net/forum?id=Xy2LbRfVrC)
Supplement: supplementary_material [file attachment]

# Towards Quantifying Incompatibilities in Evaluation Metrics for Feature Attributions: Appendix

Anonymous submission

## Theoretical Proofs

**Proposition 1** (Quadratic Representation). *If  $\mathcal{Q}$  is a generalized  $L^2$  metric, then it has the quadratic representation*

$$\mathcal{Q}(\phi) = \phi^\top A \phi - 2b^\top \phi + c,$$

where  $A = \mathbb{E}[\gamma_1^\top \gamma_1] \in \mathbb{R}^{d \times d}$  is positive semi-definite ( $A \succeq 0$ ),  $b = \mathbb{E}[\gamma_1^\top \gamma_2] \in \mathbb{R}^d$ , and  $c = \mathbb{E}[\|\gamma_2\|_2^2] \in \mathbb{R}$  is a constant.

*Proof.* Expanding the squared norm in Definition ??:

$$\begin{aligned} \mathcal{Q}(\phi) &= \mathbb{E}[\|\gamma_1 \phi - \gamma_2\|_2^2] \\ &= \mathbb{E}[(\gamma_1 \phi - \gamma_2)^\top (\gamma_1 \phi - \gamma_2)] \\ &= \mathbb{E}[\phi^\top \gamma_1^\top \gamma_1 \phi - 2\phi^\top \gamma_1^\top \gamma_2 + \gamma_2^\top \gamma_2] \\ &= \phi^\top \mathbb{E}[\gamma_1^\top \gamma_1] \phi - 2\phi^\top \mathbb{E}[\gamma_1^\top \gamma_2] + \mathbb{E}[\gamma_2^\top \gamma_2] \end{aligned}$$

Setting  $A = \mathbb{E}[\gamma_1^\top \gamma_1]$ ,  $b = \mathbb{E}[\gamma_1^\top \gamma_2]$ , and  $c = \mathbb{E}[\gamma_2^\top \gamma_2]$  yields the result. Positive semi-definiteness of  $A$  follows from  $A = \mathbb{E}[\gamma_1^\top \gamma_1]$  being an expectation of Gram matrices.  $\square$

**Proposition 2** (Optimal Metric Value). *For any generalized  $L^2$  metric  $\mathcal{Q}$  with quadratic form  $(\phi^\top A \phi - 2b^\top \phi + c)$ , the minimal achievable value is:*

$$m(\mathcal{Q}) = \min_{\phi \in \mathbb{R}^d} \mathcal{Q}(\phi) = c - b^\top A^\dagger b$$

where  $A^\dagger$  denotes the Moore-Penrose pseudoinverse.

*Proof.* Taking the gradient with respect to  $\phi$  and setting to zero:  $2A\phi - 2b = 0$ , yielding  $\phi^* = A^\dagger b$  (using the pseudoinverse to handle potential rank deficiency). Substituting back:

$$\begin{aligned} m(\mathcal{Q}) &= (A^\dagger b)^\top A (A^\dagger b) - 2b^\top A^\dagger b + c \\ &= b^\top A^\dagger A A^\dagger b - 2b^\top A^\dagger b + c \\ &= b^\top A^\dagger b - 2b^\top A^\dagger b + c = c - b^\top A^\dagger b \end{aligned}$$

where we used the property  $AA^\dagger A = A$  for the pseudoinverse.  $\square$

**Theorem 1** (Decomposition of Incompatibility). *Let  $\{(\lambda_k, v_k)\}_{k=1}^r$  be the generalized eigenpairs of  $(A_1, A_2)$  with  $A_2$  invertible, where  $r = \text{rank}(A_2)$ . Define  $\beta_{i,k} = v_k^\top b_i$  for  $i \in \{1, 2\}$ . Then the incompatibility index decomposes as:*

$$\mathcal{I}_{1,2}(\mathcal{Q}_1, \mathcal{Q}_2) = \sum_{k=1}^r \frac{(\beta_{1,k} - \lambda_k \beta_{2,k})^2}{\lambda_k (1 + \lambda_k)}$$

*Proof.* By Proposition 2, we have:

$$\begin{aligned} m_1 + m_2 &= c_1 - b_1^\top A_1^\dagger b_1 + c_2 - b_2^\top A_2^\dagger b_2 \\ m_{1,2} &= (c_1 + c_2) - (b_1 + b_2)^\top (A_1 + A_2)^\dagger (b_1 + b_2) \end{aligned}$$

Thus:

$$\mathcal{I}_{1,2} = (b_1 + b_2)^\top (A_1 + A_2)^\dagger (b_1 + b_2) - b_1^\top A_1^\dagger b_1 - b_2^\top A_2^\dagger b_2$$

Assuming  $A_2$  is invertible, the generalized eigenvectors  $\{v_k\}$  form a basis. We can express  $b_i = \sum_k \beta_{i,k} v_k$ . Using the property that  $A_1 v_k = \lambda_k A_2 v_k$  and orthogonality conditions, we obtain:

$$\begin{aligned} b_1^\top A_1^\dagger b_1 &= \sum_k \frac{\beta_{1,k}^2}{\lambda_k} v_k^\top A_2 v_k \\ b_2^\top A_2^\dagger b_2 &= \sum_k \beta_{2,k}^2 v_k^\top A_2 v_k \end{aligned}$$

As well as

$$\begin{aligned} (b_1 + b_2)^\top (A_1 + A_2)^\dagger (b_1 + b_2) &= \\ &= \sum_k \frac{(\beta_{1,k} + \beta_{2,k})^2}{1 + \lambda_k} v_k^\top A_2 v_k \end{aligned}$$

Substituting and simplifying yields the desired decomposition.  $\square$
